# Supplementary material for: Blood Endocan as a Biomarker for Breast Cancer Recurrence
Source: Preprints.org preprint supplement (doi:10.20944/preprints202401.0916.v1), 2024-01-11
Supplement: Supplementary file 1 [file supplementary]

## **Blood endocan as a biomarker for breast cancer recurrence**

Kentaro Daiki<sup>1</sup>, Yoko Kanada<sup>2</sup>, Aya Nagata<sup>3</sup>, Kanae Taruno<sup>4</sup>, Katsuhide Igarashi<sup>5</sup>,  
Toshiko Yamochi<sup>6</sup>, Hirotaka Ota<sup>6</sup>, Fumiaki Sato<sup>1</sup>, Seigo Nakamura<sup>4,\*</sup>, Yoshinori Kato<sup>1,\*</sup>

<sup>1</sup> Laboratory for Bioanalysis and Onco-Pharmaceutics, Hoshi University School of Pharmacy and Pharmaceutical Sciences, 2-4-41 Ebara, Shinagawa-ku, Tokyo, Japan;

<sup>2</sup> Department of Breast Surgical Oncology, Tokyo Rosai Hospital, 4-13-21 Ohmori-Minami, Ohta-ku, Tokyo, Japan;

<sup>3</sup> Department of Breast Surgical Oncology, Showa University Fujigaoka Hospital, 1-30 Fujigaoka, Aoba-ku, Yokohama-shi, Kanagawa, Japan;

<sup>4</sup> Division of Breast Surgical Oncology, Department of Surgery, Showa University School of Medicine, 1-5-8 Hatanodai, Shinagawa-ku, Tokyo, Japan;

<sup>5</sup> Laboratory of Biofunctional Science, Hoshi University School of Pharmacy and Pharmaceutical Sciences, 2-4-41 Ebara, Shinagawa-ku, Tokyo, Japan;

<sup>6</sup> Department of Pathology, Showa University School of Medicine, 1-5-8 Hatanodai, Shinagawa-ku, Tokyo, Japan.

Corresponding authors:

\* Seigo Nakamura, M.D., Ph.D.

Phone: +81-3-3784-8707; E-mail: [seigonak@med.showa-u.ac.jp](mailto:seigonak@med.showa-u.ac.jp)

\* Yoshinori Kato, Ph.D.

Phone: +81-3-5498-5844; E-mail: [y-kato@hoshi.ac.jp](mailto:y-kato@hoshi.ac.jp)

## Supplementary Information

### Supplementary Figures

**a**

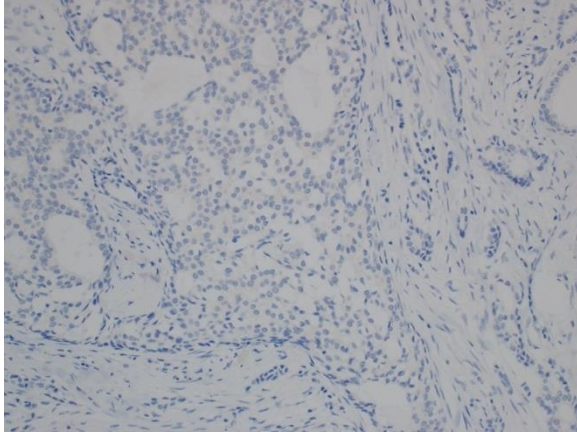

**b**

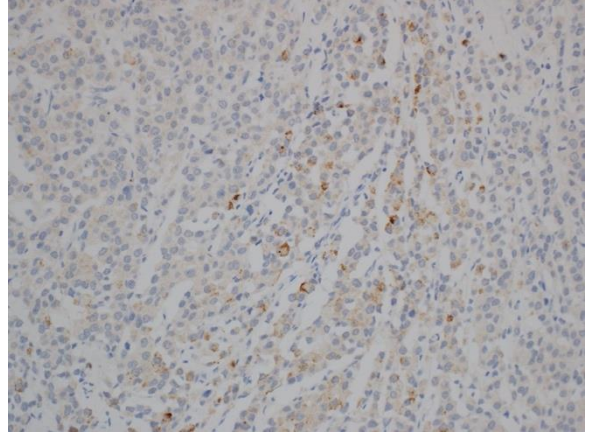

**Figure S1** Pathological assessment of endocan expression in primary breast tumors removed by the surgery. **a**, Representative tissue section from a breast cancer patient who showed blood endocan levels below the cutoff value (1.68 ng/mL). **b**, Representative tissue section from a breast cancer patient who tested positive for endocan by the blood test.

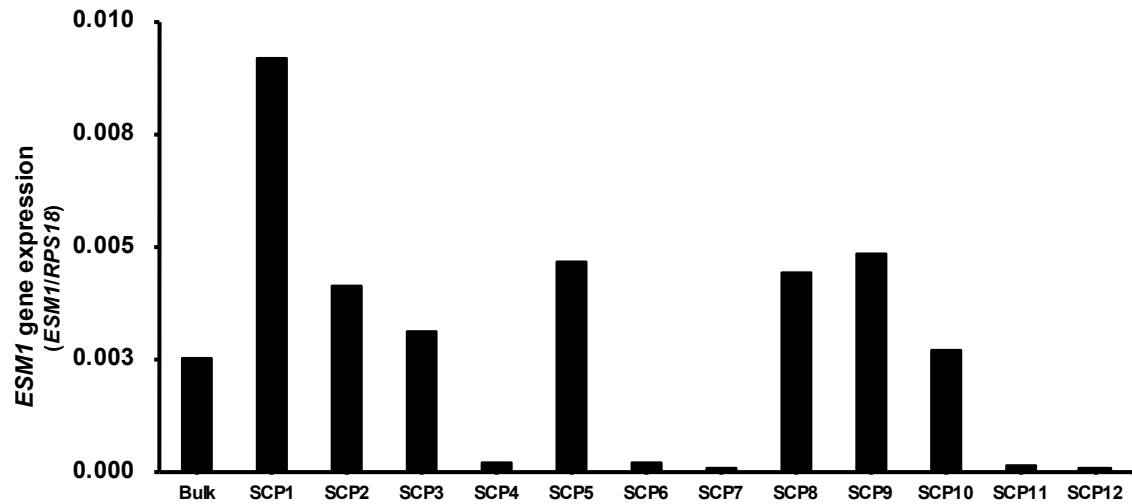

**Figure S2** Difference in *ESM1* expression of MDA-MB-231BR/*mVenus-Akaluc* obtained by limiting dilution cloning. Total RNA was extracted from twelve clones and bulk cells, and the expressions of the *ESM1* and *RPS18* were quantitated in real-time PCR. Each primer used in this study was as follows: *ESM1*-FW (5'-TTG CTA CCG CAC AGT CTC AG-3'), *ESM1*-RV (5'-GTG CCG TAG GGA CAG TCT TT-3'), *RPS18*-FW (5'-ATA CAG CCA GGT CCT AGC CA-3'), *RPS18*-RV (5'-AAG TGA CGC AGC CCT CTA TG-3').

## Supplementary Tables

**Table S1** Clinical characteristics of breast cancer patients whose blood was collected before and after the surgery.

| Clinicopathological features   | Total patients, <i>N</i><br>( <i>N</i> = 16) | Endocan negative<br>population, <i>N</i> (%)<br>( <i>N</i> = 8) |          | Endocan positive<br>population, <i>N</i> (%)<br>( <i>N</i> = 8) |          |
|--------------------------------|----------------------------------------------|-----------------------------------------------------------------|----------|-----------------------------------------------------------------|----------|
| <u>Age at blood collection</u> |                                              |                                                                 |          |                                                                 |          |
| Median (years)                 | 53                                           | 52                                                              |          | 52                                                              |          |
| (Minimum-Maximum)              | (42-83)                                      | (46-83)                                                         |          | (42-76)                                                         |          |
| <u>Menopausal status</u>       |                                              |                                                                 |          |                                                                 |          |
| Pre-menopausal                 | 9                                            | 4                                                               | (44.4%)  | 5                                                               | (55.6%)  |
| Post-menopausal                | 7                                            | 4                                                               | (57.1%)  | 3                                                               | (42.9%)  |
| <u>BMI</u>                     |                                              |                                                                 |          |                                                                 |          |
| BMI<25%                        | 12                                           | 6                                                               | (50.0%)  | 6                                                               | (50.0%)  |
| BMI≥ 25%                       | 4                                            | 2                                                               | (50.0%)  | 2                                                               | (50.0%)  |
| <u>ER expression</u>           |                                              |                                                                 |          |                                                                 |          |
| <90%                           | 0                                            |                                                                 |          |                                                                 |          |
| ≥ 90%                          | 16                                           | 8                                                               | (50.0%)  | 8                                                               | (50.0%)  |
| <u>PgR expression</u>          |                                              |                                                                 |          |                                                                 |          |
| <10%                           | 2                                            | 1                                                               | (50.0%)  | 1                                                               | (50.0%)  |
| 10% ≤ PgR <90%                 | 4                                            | 2                                                               | (50.0%)  | 2                                                               | (50.0%)  |
| ≥ 90%                          | 10                                           | 5                                                               | (50.0%)  | 5                                                               | (50.0%)  |
| <u>Tumor size</u>              |                                              |                                                                 |          |                                                                 |          |
| Tis*                           | 1                                            | 1                                                               | (100.0%) | 0                                                               | (0.0%)   |
| T1                             | 9                                            | 5                                                               | (55.6%)  | 4                                                               | (44.4%)  |
| T2                             | 6                                            | 2                                                               | (33.3%)  | 4                                                               | (66.7%)  |
| <u>Lymph node metastasis</u>   |                                              |                                                                 |          |                                                                 |          |
| N-                             | 11                                           | 6                                                               | (54.5%)  | 5                                                               | (45.5%)  |
| N+                             | 5                                            | 2                                                               | (40.0%)  | 3                                                               | (60.0%)  |
| <u>Pathological Stage</u>      |                                              |                                                                 |          |                                                                 |          |
| 0                              | 1                                            | 1                                                               | (100.0%) | 0                                                               | (0.0%)   |
| I                              | 7                                            | 4                                                               | (57.1%)  | 3                                                               | (42.9%)  |
| II                             | 8                                            | 3                                                               | (37.5%)  | 5                                                               | (62.5%)  |
| <u>Ki67 labeling index</u>     |                                              |                                                                 |          |                                                                 |          |
| <20%                           | 11                                           | 6                                                               | (54.5%)  | 5                                                               | (45.5%)  |
| ≥ 20%                          | 4                                            | 2                                                               | (50.0%)  | 2                                                               | (50.0%)  |
| Unknown                        | 1                                            | 0                                                               | (0.0%)   | 1                                                               | (100.0%) |

\* Tis: Ductal carcinoma in situ (DCIS) or Paget's disease with no associated tumor mass.

**Table S2** Clinical characteristics of breast cancer patients with postoperative recurrence.

| Clinicopathological features   | Total patients, <i>N</i><br>( <i>N</i> = 20) | Endocan negative<br>population, <i>N</i> (%)<br>( <i>N</i> = 7) |         | Endocan positive<br>population, <i>N</i> (%)<br>( <i>N</i> = 13) |          |
|--------------------------------|----------------------------------------------|-----------------------------------------------------------------|---------|------------------------------------------------------------------|----------|
| <u>Age at blood collection</u> |                                              |                                                                 |         |                                                                  |          |
| Median (years)                 | 55                                           | 63                                                              |         | 55                                                               |          |
| (Minimum-Maximum)              | (35-78)                                      | (35-78)                                                         |         | (41-70)                                                          |          |
| <u>ER expression</u>           |                                              |                                                                 |         |                                                                  |          |
| <90%                           | 9                                            | 3                                                               | (33.3%) | 6                                                                | (66.7%)  |
| ≥ 90%                          | 11                                           | 4                                                               | (36.4%) | 7                                                                | (63.6%)  |
| <u>PgR expression</u>          |                                              |                                                                 |         |                                                                  |          |
| <10%                           | 11                                           | 4                                                               | (36.4%) | 7                                                                | (63.6%)  |
| 10% ≤ PgR <90%                 | 5                                            | 1                                                               | (20.0%) | 4                                                                | (80.0%)  |
| ≥ 90%                          | 4                                            | 2                                                               | (50.0%) | 2                                                                | (50.0%)  |
| <u>HER2 expression</u>         |                                              |                                                                 |         |                                                                  |          |
| ≤ 1+                           | 16                                           | 7                                                               | (43.8%) | 9                                                                | (56.3%)  |
| 2+                             | 3                                            | 0                                                               | (0.0%)  | 3                                                                | (100.0%) |
| ≥ 3+                           | 1                                            | 0                                                               | (0.0%)  | 1                                                                | (100.0%) |
| <u>Subtype</u>                 |                                              |                                                                 |         |                                                                  |          |
| Luminal                        | 12                                           | 5                                                               | (41.7%) | 7                                                                | (58.3%)  |
| HER2                           | 1                                            | 0                                                               | (0.0%)  | 1                                                                | (100.0%) |
| Triple-negative                | 7                                            | 2                                                               | (28.6%) | 5                                                                | (71.4%)  |
| <u>Ki67 labeling index</u>     |                                              |                                                                 |         |                                                                  |          |
| <20%                           | 6                                            | 2                                                               | (33.3%) | 4                                                                | (66.7%)  |
| ≥ 20%                          | 14                                           | 5                                                               | (35.7%) | 9                                                                | (64.3%)  |

**Table S3** Effect of the interval between the surgery and the blood collection on changes in blood endocan levels.

| Patient # | Pre-surgical<br>endocan level<br>(ng/mL) | Post-surgical<br>endocan level<br>(ng/mL) | UP<br>or<br>DOWN | Interval of time between the<br>surgery and the blood collection<br>(Days) |
|-----------|------------------------------------------|-------------------------------------------|------------------|----------------------------------------------------------------------------|
| 1         | 5.97                                     | 10.90                                     | UP               | 29                                                                         |
| 2         | 5.66                                     | 1.03                                      | DOWN             | 32                                                                         |
| 3         | 12.45                                    | 1.47                                      | DOWN             | 32                                                                         |
| 4         | 17.31                                    | 5.60                                      | DOWN             | 46                                                                         |
| 5         | 5.60                                     | 4.38                                      | DOWN             | 59                                                                         |
| 6         | 4.41                                     | 2.20                                      | DOWN             | 64                                                                         |
| 7         | 2.24                                     | 14.51                                     | UP               | 67                                                                         |
| 8         | 19.64                                    | 10.86                                     | DOWN             | 83                                                                         |

**Table S4** Endocan, CEA, and CA15-3 concentrations in the blood samples of patients with postoperative breast cancer recurrence.

| Patient # | Endocan level<br>(ng/mL) | CEA level<br>(ng/mL) | CA15-3 level<br>(U/mL) |
|-----------|--------------------------|----------------------|------------------------|
| 1         | <0.156                   | 5.6                  | 23.9                   |
| 2         | 0.16                     | 2.8                  | 12.4                   |
| 3         | 0.30                     | 4.8                  | 8.1                    |
| 4         | 0.43                     | 3.1                  | 85.9                   |
| 5         | 0.61                     | 4.6                  | 17.4                   |
| 6         | 0.89                     | 2.7                  | 14.6                   |
| 7         | 1.22                     | 1.5                  | 14.2                   |
| 8         | 2.35                     | 9.4                  | 189.9                  |
| 9         | 3.88                     | 1.7                  | 5.8                    |
| 10        | 4.48                     | 0.9                  | 5.5                    |
| 11        | 5.20                     | 1.4                  | 25.6                   |
| 12        | 5.78                     | 0.6                  | 18.1                   |
| 13        | 5.80                     | 1.3                  | 4.6                    |
| 14        | 6.21                     | 23.9                 | 8.6                    |
| 15        | 6.63                     | 1.7                  | 27.2                   |
| 16        | 9.13                     | 10.2                 | 95.7                   |
| 17        | 9.45                     | 6.4                  | 30.2                   |
| 18        | 10.34                    | 2.1                  | 6.5                    |
| 19        | 10.75                    | 23.4                 | 34.7                   |
| 20        | 10.82                    | 4.1                  | 9.0                    |

Red numbers indicate positive for the respective biomarker.
